# Supplementary material for: Controlled fabrication and photocatalytic properties of a three-dimensional ZnO nanowire/reduced graphene oxide/CdS heterostructure on carbon cloth
Source: Royal Society of Chemistry journal article supplement (doi:10.1039/c3nr03969b), 2013-01-01
Supplement: c3nr03969b.pdf [file c3nr03969b.pdf]

## Supplementary Information

### Controlled Fabrication and Photocatalytic Property of Three-Dimensional ZnO Nanowire/Reduced Graphene Oxide/CdS Heterostructure on Carbon Cloth

Yajun Wang, Fengmei Wang and Jun He\*

National Center for Nanoscience and Technology, Beijing 100190, P. R. China.

Corresponding author. Email: hej@nanocr.cn. Tel.: 86-10-82545670

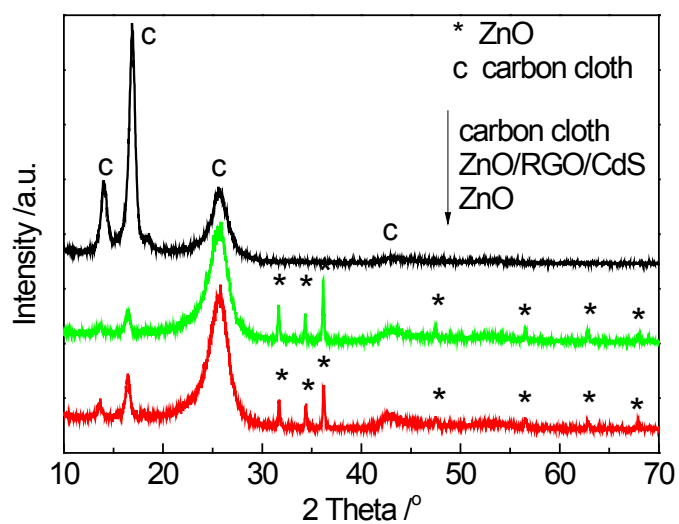

Fig. S1 XRD pattern of carbon cloth, ZnO and ZnO/RGO/CdS.

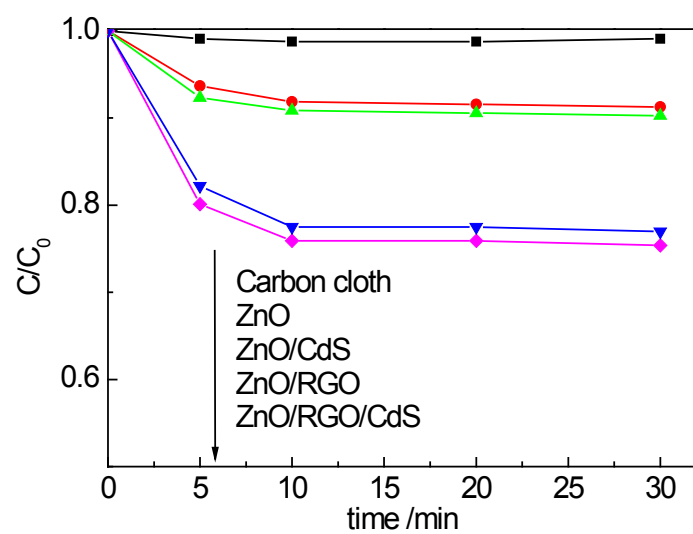

Fig. S2 MB adsorption of carbon cloth, ZnO, ZnO/RGO, ZnO/CdS and ZnO/RGO/CdS photocatalysts
